# Supplementary material for: Prescription of lipid-lowering medications for patients with type 2 diabetes mellitus and risk-associated LDL cholesterol: a nationwide study of guideline adherence from the Swedish National Diabetes Register
Source: PubMed Central journal article supplement (PMC6260691; doi:10.1186/s12913-018-3707-4), 2018-11-28
Supplement: 12913_2018_3707_MOESM1_ESM.pdf [file 12913_2018_3707_MOESM1_ESM.pdf]

|                                                      | 2007          | 2008          | 2009          | 2010          | 2011          | 2012          | 2013          | 2014          |
|------------------------------------------------------|---------------|---------------|---------------|---------------|---------------|---------------|---------------|---------------|
| Characteristics                                      | n=45,091      | n=55,452      | n=68,892      | n=106,258     | n=132,783     | n=128,542     | n=108,874     | n=111,051     |
| Men, n (%)                                           | 23,642 (52.4) | 28,974 (52.3) | 36,324 (52.7) | 55,202 (52.0) | 69,039 (52.0) | 67,506 (52.5) | 56,896 (52.3) | 58,445 (52.6) |
| Age, mean                                            | 63.6 ± 11.4   | 63.6 ± 11.4   | 63.5 ± 11.5   | 63.5 ± 11.6   | 63.6 ± 11.7   | 63.8 ± 11.7   | 63.9 ± 11.9   | 64.1 ± 12.0   |
| Diabetes duration, mean years                        | 7.7 ± 7.1     | 7.5 ± 7.0     | 7.5 ± 7.1     | 7.2 ± 6.9     | 7.2 ± 7.0     | 7.3 ± 7.0     | 7.4 ± 7.1     | 7.6 ± 7.2     |
| HbA1c, mean mmol/mol                                 | 53.5 ± 13.2   | 53.9 ± 13.2   | 54.1 ± 13.5   | 54.7 ± 13.8   | 54.7 ± 14.5   | 55.4 ± 15.1   | 54.8 ± 15.5   | 54.9 ± 15.8   |
| Diabetes medications, n (%)                          | 32,869 (73.1) | 39,809 (71.9) | 49,632 (72.2) | 78,541 (74.0) | 98,594 (74.4) | 96,596 (76.1) | 81,390 (74.9) | 83,108 (75.2) |
| Antiplatelets <sup>c</sup> , n (%)                   | 13,774 (31.2) | 16,102 (29.9) | 19,027 (28.5) | 27,334 (26.2) | 30,891 (23.6) | 26,790 (21.3) | 19,956 (18.8) | 17,270 (15.9) |
| Antihypertensives, n (%)                             | 29,614 (67.3) | 37,001 (68.4) | 46,784 (69.4) | 72,499 (69.4) | 90,388 (69.7) | 86,731 (69.0) | 72,482 (67.9) | 73,408 (67.0) |
| Systolic blood pressure, mean mmHg                   | 139.2 ± 17.0  | 138.3 ± 16.6  | 137.5 ± 16.4  | 137.3 ± 16.4  | 136.9 ± 16.1  | 136.9 ± 16.2  | 136.6 ± 16.2  | 136.6 ± 16.3  |
| Diastolic blood pressure, mean mmHg                  | 78.1 ± 9.6    | 78.2 ± 9.5    | 78.2 ± 9.6    | 78.3 ± 9.5    | 78.2 ± 9.6    | 78.6 ± 9.7    | 78.7 ± 9.7    | 79.0 ± 9.8    |
| Total cholesterol, mean mmol/l                       | 5.4 ± 0.8     | 5.4 ± 0.8     | 5.4 ± 0.9     | 5.4 ± 0.9     | 5.4 ± 0.9     | 5.5 ± 0.9     | 5.5 ± 0.9     | 5.5 ± 0.9     |
| LDL cholesterol, mean mmol/l                         | 3.3 ± 0.7     | 3.3 ± 0.7     | 3.4 ± 0.7     | 3.4 ± 0.7     | 3.4 ± 0.7     | 3.4 ± 0.7     | 3.4 ± 0.7     | 3.4 ± 0.7     |
| HDL cholesterol, mean mmol/l                         | 1.3 ± 0.3     | 1.3 ± 0.3     | 1.3 ± 0.3     | 1.3 ± 0.4     | 1.3 ± 0.4     | 1.3 ± 0.4     | 1.3 ± 0.4     | 1.3 ± 0.4     |
| Triglycerides, mean mmol/l                           | 1.7 ± 0.8     | 1.8 ± 0.8     | 1.8 ± 0.8     | 1.7 ± 0.8     | 1.7 ± 0.9     | 1.8 ± 1.0     | 1.8 ± 1.0     | 1.8 ± 1.0     |
| eGFR, mean ml/min/1.73m                              | 83.2 ± 23.5   | 85.4 ± 24.1   | 85.6 ± 25.2   | 85.2 ± 24.0   | 86.1 ± 24.9   | 86.5 ± 25.4   | 85.9 ± 25.6   | 85.5 ± 26.5   |
| Microalbuminuria, n (%)                              | 6,635 (18.5)  | 7,645 (17.6)  | 9,500 (18.4)  | 13,023 (17.9) | 15,186 (17.8) | 14,519 (17.4) | 12,846 (17.6) | 13,458 (17.7) |
| Macroalbuminuria, n (%)                              | 2,614 (6.6)   | 2,816 (6.0)   | 3,775 (6.8)   | 4,419 (5.7)   | 4,735 (5.4)   | 4,348 (5.4)   | 3,544 (5.3)   | 3,644 (5.4)   |
| BMI, mean kg/m <sup>2</sup>                          | 29.9 ± 5.3    | 30.0 ± 5.3    | 30.0 ± 5.4    | 30.2 ± 5.4    | 30.2 ± 5.5    | 30.2 ± 5.5    | 30.1 ± 5.5    | 30.1 ± 5.5    |
| Physical activity < once a week <sup>a</sup> , n (%) | 7,230 (21.9)  | 8,068 (21.2)  | 10,778 (23.9) | 14,408 (25.1) | 16,240 (25.0) | 51,036 (23.8) | 15,783 (24.1) | 16,854 (26.0) |
| Smoking <sup>b</sup> , n (%)                         | 5,893 (14.5)  | 7,393 (15.5)  | 9,056 (16.2)  | 15,073 (17.3) | 18,792 (18.4) | 17,544 (17.1) | 14,615 (17.2) | 15,508 (18.2) |

Abbreviations: HbA1c, haemoglobin A1c; LDL, low-density lipoprotein; HDL, high-density lipoprotein; eGFR, estimated glomerular filtration rate; BMI, body mass index.

<sup>a</sup>30-minute walk or equivalent

<sup>b</sup>smoking at least one cigarette or pipe per day, or quit smoking within three months

<sup>c</sup>ATC code B01AC and N02BA01
