# Supplementary material for: Prescription of lipid-lowering medications for patients with type 2 diabetes mellitus and risk-associated LDL cholesterol: a nationwide study of guideline adherence from the Swedish National Diabetes Register
Source: PubMed Central journal article supplement (PMC6260691; doi:10.1186/s12913-018-3707-4), 2018-11-28
Supplement: 12913_2018_3707_MOESM2_ESM.pdf [file 12913_2018_3707_MOESM2_ESM.pdf]

| Characteristics                                      | 2007<br>n=24,405 | 2008<br>n=31,013 | 2009<br>n=40,178 | 2010<br>n=63,712 | 2011<br>n=78,469 | 2012<br>n=75,393 | 2013<br>n=65,156 | 2014<br>n=69,097 |
|------------------------------------------------------|------------------|------------------|------------------|------------------|------------------|------------------|------------------|------------------|
| Men, n (%)                                           | 15,096 (61.9)    | 19,152 (61.8)    | 24,736 (61.6)    | 38,758 (60.8)    | 47,763 (60.9)    | 46,266 (61.4)    | 40,280 (61.8)    | 42,840 (62.0)    |
| Age, mean                                            | 70.8 ± 9.3       | 71.0 ± 9.3       | 71.1 ± 9.5       | 71.2 ± 9.6       | 71.4 ± 9.5       | 71.5 ± 9.5       | 71.7 ± 9.6       | 72.0 ± 9.5       |
| Diabetes duration, mean years                        | 10.1 ± 8.2       | 10.0 ± 8.2       | 10.2 ± 8.3       | 10.1 ± 8.2       | 10.3 ± 8.4       | 10.6 ± 8.5       | 11.0 ± 8.5       | 11.4 ± 8.6       |
| HbA1c, mean mmol/mol                                 | 53.9 ± 12.4      | 54.5 ± 12.4      | 54.9 ± 12.8      | 55.4 ± 13.0      | 55.6 ± 13.6      | 56.2 ± 14.0      | 55.7 ± 14.4      | 55.9 ± 14.6      |
| Diabetes medications, n (%)                          | 18,947 (77.8)    | 23,824 (76.9)    | 30,857 (76.9)    | 49,906 (78.4)    | 61,573 (78.5)    | 59,776 (79.7)    | 51,438 (79.0)    | 54,066 (78.6)    |
| Antiplatelets <sup>c</sup> , n (%)                   | 18,727 (77.9)    | 23,355 (76.7)    | 30,018 (76.4)    | 47,050 (75.1)    | 57,180 (74.0)    | 53,678 (72.4)    | 43,899 (68.9)    | 42,383 (63.4)    |
| Antihypertensives, n (%)                             | 22,087 (91.4)    | 28,113 (91.7)    | 36,693 (92.1)    | 58,076 (92.0)    | 70,801 (91.6)    | 67,506 (90.6)    | 57,568 (89.5)    | 61,091 (89.3)    |
| Systolic blood pressure, mean mmHg                   | 138.4 ± 17.7     | 137.5 ± 17.3     | 136.9 ± 17.1     | 136.4 ± 17.0     | 136.1 ± 16.8     | 135.6 ± 16.7     | 135.6 ± 16.6     | 135.6 ± 16.7     |
| Diastolic blood pressure, mean mmHg                  | 75.0 ± 9.8       | 74.8 ± 9.8       | 74.8 ± 9.8       | 74.6 ± 9.8       | 74.7 ± 9.8       | 75.0 ± 9.8       | 75.0 ± 9.9       | 75.2 ± 9.9       |
| Total cholesterol, mean mmol/l                       | 4.8 ± 0.9        | 4.8 ± 0.9        | 4.8 ± 0.9        | 4.7 ± 0.9        | 4.8 ± 1.0        | 4.8 ± 1.0        | 4.7 ± 1.0        | 4.7 ± 1.0        |
| LDL cholesterol, mean mmol/l                         | 2.8 ± 0.7        | 2.7 ± 0.7        | 2.8 ± 0.8        | 2.8 ± 0.8        | 2.8 ± 0.8        | 2.7 ± 0.8        | 2.7 ± 0.8        | 2.7 ± 0.8        |
| HDL cholesterol, mean mmol/l                         | 1.2 ± 0.3        | 1.2 ± 0.3        | 1.2 ± 0.3        | 1.2 ± 0.3        | 1.2 ± 0.3        | 1.2 ± 0.4        | 1.2 ± 0.4        | 1.2 ± 0.3        |
| Triglycerides, mean mmol/l                           | 1.8 ± 0.8        | 1.8 ± 0.8        | 1.8 ± 0.8        | 1.8 ± 0.8        | 1.8 ± 0.9        | 1.8 ± 0.9        | 1.8 ± 1.0        | 1.8 ± 1.0        |
| eGFR, mean ml/min/1.73m                              | 73.3 ± 23.6      | 74.5 ± 23.9      | 74.3 ± 24.8      | 74.4 ± 24.3      | 74.7 ± 24.4      | 74.9 ± 25.6      | 74.2 ± 25.2      | 73.6 ± 26.6      |
| Microalbuminuria, n (%)                              | 4,741 (25.8)     | 5,661 (24.5)     | 7,324 (25.3)     | 11,320 (26.0)    | 13,047 (25.3)    | 12,457 (25.2)    | 11,237 (25.5)    | 11,911 (26.7)    |
| Macroalbuminuria, n (%)                              | 2,590 (12.1)     | 2,994 (11.5)     | 4,173 (12.9)     | 5,299 (11.2)     | 5,569 (10.4)     | 5,403 (11.2)     | 4,431 (10.9)     | 4,546 (11.6)     |
| BMI, mean kg/m <sup>2</sup>                          | 29.4 ± 4.8       | 29.5 ± 4.9       | 29.6 ± 5.1       | 29.8 ± 5.1       | 29.8 ± 5.2       | 29.8 ± 5.2       | 29.7 ± 5.2       | 29.6 ± 5.2       |
| Physical activity < once a week <sup>a</sup> , n (%) | 5,989 (31.5)     | 6,887 (30.7)     | 9,117 (32.7)     | 12,035 (33.6)    | 13,532 (33.2)    | 13,305 (32.7)    | 13,170 (32.7)    | 13,451 (33.7)    |
| Smoking <sup>b</sup> , n (%)                         | 2,630 (11.9)     | 3,290 (12.2)     | 4,196 (12.8)     | 7,373 (14.1)     | 9,048 (14.6)     | 8,693 (14.1)     | 7,116 (13.7)     | 7,420 (14.2)     |

Abbreviations: HbA1c, haemoglobin A1c; LDL, low-density lipoprotein; HDL, high-density lipoprotein; eGFR, estimated glomerular filtration rate; BMI, body mass index.

<sup>a</sup>30-minute walk or equivalent

<sup>b</sup>smoking at least one cigarette or pipe per day, or quit smoking within three months

<sup>c</sup>ATC code B01AC and N02BA01
