# Supplementary material for: Prescription of lipid-lowering medications for patients with type 2 diabetes mellitus and risk-associated LDL cholesterol: a nationwide study of guideline adherence from the Swedish National Diabetes Register
Source: PubMed Central journal article supplement (PMC6260691; doi:10.1186/s12913-018-3707-4), 2018-11-28
Supplement: 12913_2018_3707_MOESM3_ESM.pdf [file 12913_2018_3707_MOESM3_ESM.pdf]

| Year | Primary prevention |                        | Secondary prevention |                        |
|------|--------------------|------------------------|----------------------|------------------------|
|      | Crude<br>n=688,813 | Adjusted*<br>n=219,254 | Crude<br>n=347,025   | Adjusted*<br>n=114,325 |
|      | Mean (95% CI)      | Mean (95% CI)          | Mean (95% CI)        | Mean (95% CI)          |
| 2007 | 35.1 (34.7–35.6)   | 42.2 (40.7–43.7)       | 74.2 (73.6–74.7)     | 65.6 (63.5–67.6)       |
| 2008 | 39.5 (39.1–39.9)   | 46.3 (44.8–47.7)       | 76.4 (76.0–76.9)     | 69.4 (67.5–71.2)       |
| 2009 | 43.4 (43.1–43.8)   | 49.8 (48.4–51.3)       | 78.1 (77.7–78.5)     | 72.0 (70.3–73.7)       |
| 2010 | 45.6 (45.2–45.9)   | 52.4 (51.0–53.9)       | 78.4 (78.0–78.8)     | 73.8 (72.1–75.5)       |
| 2011 | 47.8 (47.5–48.1)   | 52.7 (51.3–54.1)       | 78.9 (78.5–79.2)     | 74.4 (72.7–76.1)       |
| 2012 | 48.7 (48.4–49.0)   | 52.7 (51.3–54.2)       | 77.8 n(77.4–78.2)    | 72.9 (71.1–74.6)       |
| 2013 | 49.2 (48.9–49.6)   | 52.7 (51.2–54.2)       | 76.6 (76.2–77.0)     | 71.6 (69.7–73.4)       |
| 2014 | 50.2 (49.9–50.6)   | 52.1 (50.6–53.6)       | 76.0 (75.6–76.4)     | 71.1 (69.2–72.9)       |

\* Adjusted for year, county council, type of care, sex, age, HbA1c, eGFR, diabetes duration, diabetes medications, antihypertensives, antiplatelets, blood pressure, microalbuminuria, macroalbuminuria, BMI, physical activity, smoking and cholesterol levels.
