# Supplementary material for: Prescription of lipid-lowering medications for patients with type 2 diabetes mellitus and risk-associated LDL cholesterol: a nationwide study of guideline adherence from the Swedish National Diabetes Register
Source: PubMed Central journal article supplement (PMC6260691; doi:10.1186/s12913-018-3707-4), 2018-11-28
Supplement: 12913_2018_3707_MOESM4_ESM.pdf [file 12913_2018_3707_MOESM4_ESM.pdf]

|      | Primary prevention |                        | Secondary prevention |                        |
|------|--------------------|------------------------|----------------------|------------------------|
|      | Crude<br>n=692,343 | Adjusted*<br>n=220,094 | Crude<br>n=352,793   | Adjusted*<br>n=115,630 |
| Year | Mean (95% CI)      | Mean (95% CI)          | Mean (95% CI)        | Mean (95% CI)          |
| 2007 | 35.2 (34.7–35.6)   | 42.2 (40.7–43.6)       | 74.0 (73.4–74.5)     | 64.9 (62.9–66.9)       |
| 2008 | 39.6 (39.2–40.0)   | 46.2 (44.8–47.6)       | 76.2 (75.8–76.7)     | 68.6 (66.8–70.4)       |
| 2009 | 43.5 (43.1–43.8)   | 49.8 (48.4–51.2)       | 78.0 (77.6–78.4)     | 71.4 (69.7–73.0)       |
| 2010 | 45.6 (45.3–45.9)   | 52.4 (51.0–53.7)       | 78.2 (77.8–78.5)     | 72.9 (71.3–74.6)       |
| 2011 | 47.8 (47.5–48.1)   | 52.6 (51.2–54.0)       | 78.6 (78.3–79.0)     | 73.8 (72.1–75.4)       |
| 2012 | 48.7 (48.4–49.0)   | 52.6 (51.2–54.0)       | 77.4 (77.1–77.8)     | 72.2 (70.4–73.8)       |
| 2013 | 49.1 (48.8–49.4)   | 52.6 (51.1–54.0)       | 76.1 (75.7–76.5)     | 70.7 (68.9–72.5)       |
| 2014 | 50.1 (49.7–50.4)   | 52.0 (50.6–53.5)       | 75.5 (75.1–75.9)     | 70.4 (68.6–72.1)       |

\* Adjusted for year, county council, type of care, sex, age, HbA1c, eGFR, diabetes duration, diabetes medications, antihypertensives, antiplatelets, blood pressure, microalbuminuria, macroalbuminuria, BMI, physical activity, smoking and cholesterol levels.
