# Supplementary material for: Prescription of lipid-lowering medications for patients with type 2 diabetes mellitus and risk-associated LDL cholesterol: a nationwide study of guideline adherence from the Swedish National Diabetes Register
Source: PubMed Central journal article supplement (PMC6260691; doi:10.1186/s12913-018-3707-4), 2018-11-28
Supplement: 12913_2018_3707_MOESM5_ESM.pdf [file 12913_2018_3707_MOESM5_ESM.pdf]

|      | Primary prevention |                        | Secondary prevention |                        |
|------|--------------------|------------------------|----------------------|------------------------|
|      | Crude<br>n=751,864 | Adjusted*<br>n=237,751 | Crude<br>n=437,618   | Adjusted*<br>n=140,513 |
| Year | Mean (95% CI)      | Mean (95% CI)          | Mean (95% CI)        | Mean (95% CI)          |
| 2007 | 34.6 (34.2–35.0)   | 36.1 (34.7–37.5)       | 70.7 (70.2–71.2)     | 58.7 (56.8–60.6)       |
| 2008 | 38.9 (38.5–39.3)   | 40.2 (38.9–41.6)       | 72.8 (72.4–73.3)     | 63.2 (61.4–64.9)       |
| 2009 | 42.7 (42.3–43.0)   | 43.7 (42.4–45.1)       | 74.7 (74.3–75.1)     | 66.3 (64.6–68.0)       |
| 2010 | 44.7 (44.4–45.0)   | 46.3 (44.9–47.7)       | 74.8 (74.5–75.1)     | 68.0 (66.4–69.7)       |
| 2011 | 46.7 (46.4–47.0)   | 46.6 (45.2–48.0)       | 75.2 (74.9–75.5)     | 69.3 (67.7–70.9)       |
| 2012 | 47.4 (47.1–47.7)   | 46.6 (45.2–48.0)       | 73.7 (73.3–74.0)     | 68.1 (66.4–69.7)       |
| 2013 | 47.6 (47.3–47.9)   | 46.6 (45.2–48.0)       | 72.0 (71.6–72.3)     | 67.1 (65.4–68.8)       |
| 2014 | 48.3 (48.0–48.7)   | 46.1 (44.7–47.5)       | 71.1 (70.7–71.5)     | 66.1 (64.4–67.8)       |

\* Adjusted for year, county council, type of care, sex, age, HbA1c, eGFR, diabetes duration, diabetes medications, antihypertensives, antiplatelets, blood pressure, microalbuminuria, macroalbuminuria, BMI, physical activity, smoking and cholesterol levels.
